# Supplementary material
Source: Springer Nature journal article supplement (https://www.springermedizin.de/resource/supplementary/12906_2011_414_MOESM1_ESM.pdf/9519726)

**A****Cal27**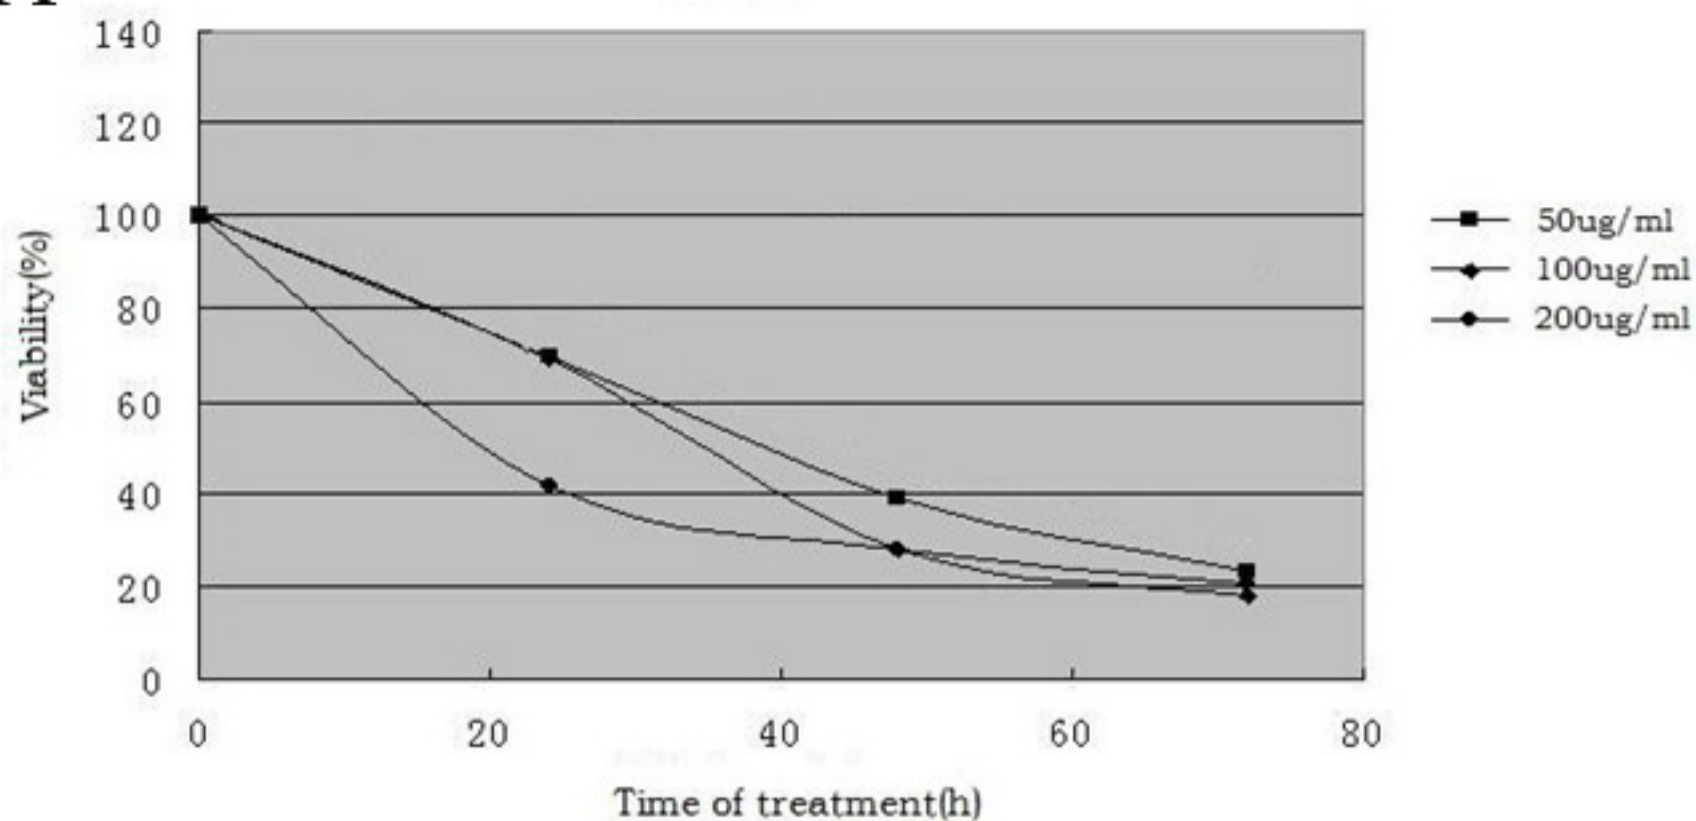**B****SCC4**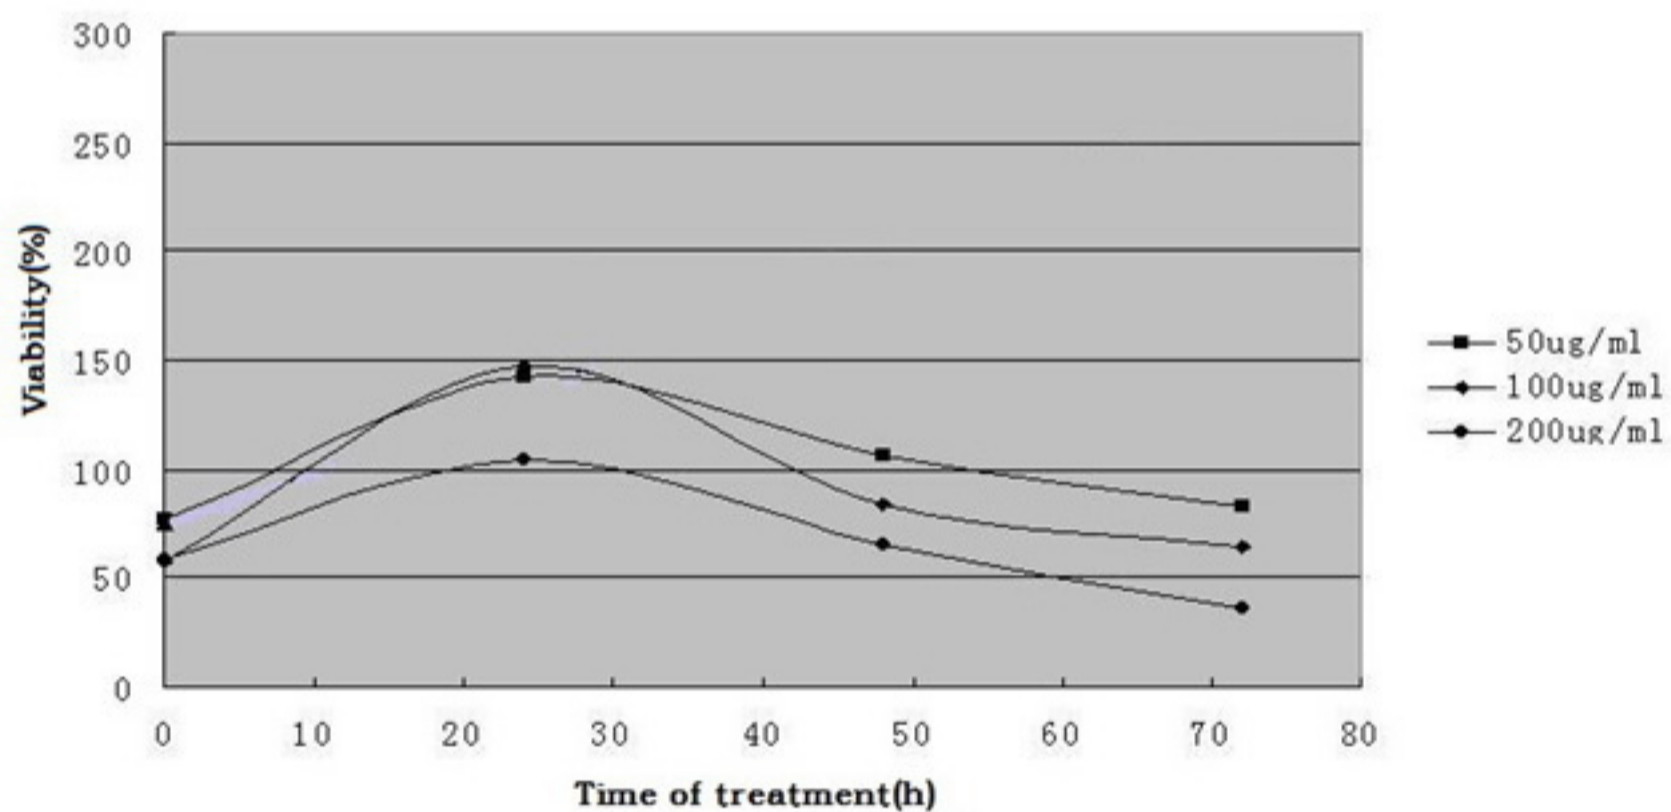**C****Leuk1**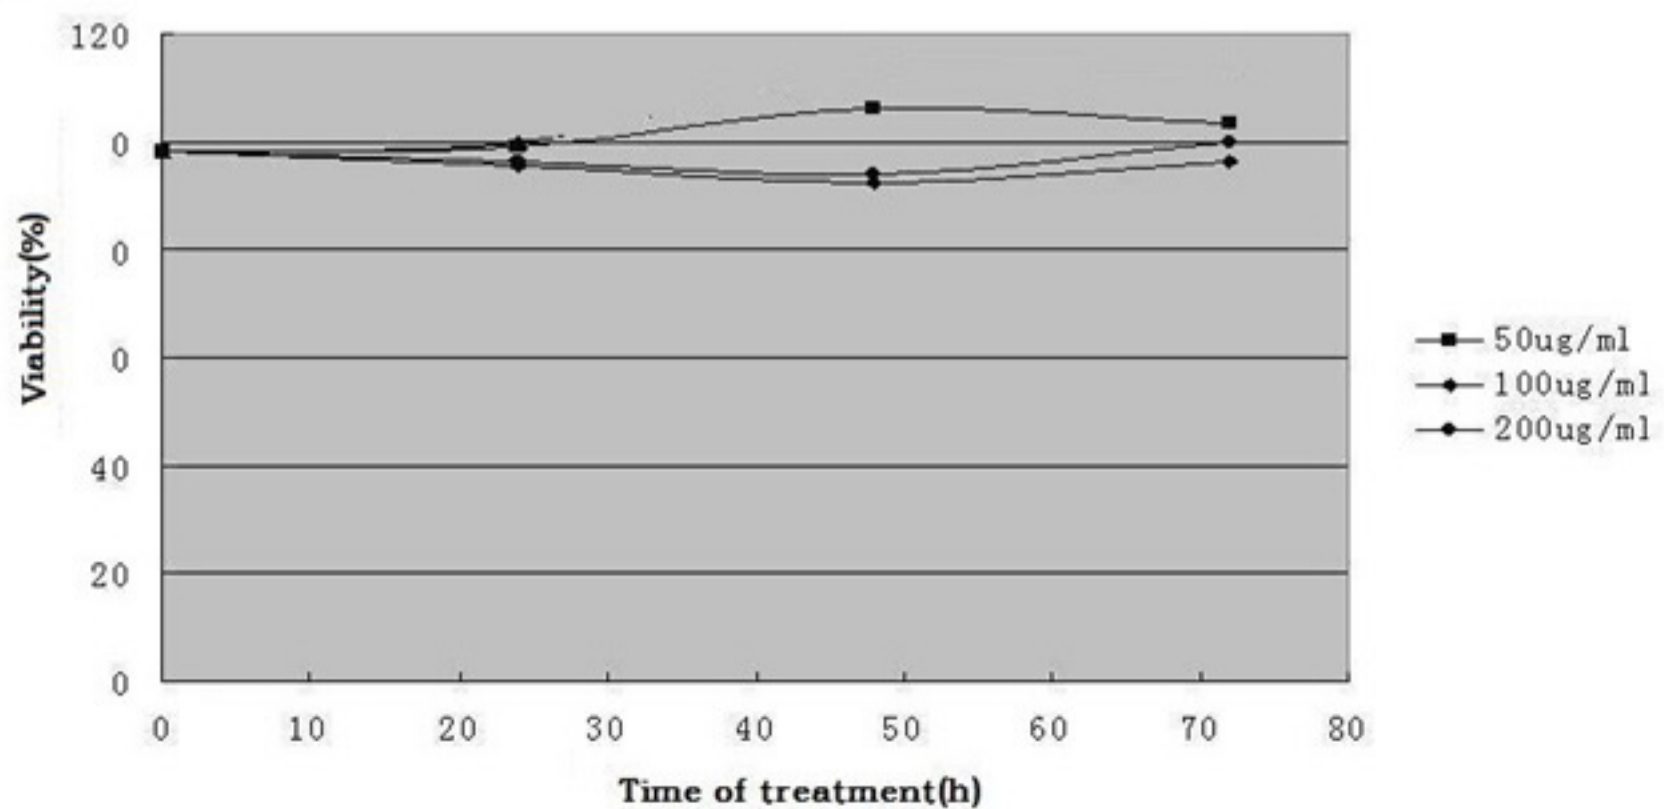

Supplement: MOESM1 [file 9519726]
